# Supplementary material for: Naked eye plasmonic indicator with multi-responsive polymer brush as signal transducer and amplifier
Source: Royal Society of Chemistry journal article supplement (doi:10.1039/c6nr09631j), 2017-01-01
Supplement: c6nr09631j1.pdf [file c6nr09631j1.pdf]

# Electronic Supplementary Information

## Plasmonic Indicator by Naked Eyes with Multi-Responsive Polymer Brush as Signal Transducer and Amplifier

Tieqiang Wang,<sup>\*a</sup> Ye Yu,<sup>b</sup> Dan Chen,<sup>a</sup> Shuli Wang,<sup>c</sup> Xuemin Zhang,<sup>a</sup> Yunong Li,<sup>a</sup>  
Junhu Zhang<sup>c</sup> and Yu Fu<sup>\*a</sup>

- a. College of Sciences, Northeastern University, Shenyang 110819, P. R. China.  
Email: wangtieqiang@mail.neu.edu.cn, fuyu@mail.neu.edu.cn.
- b. Leibniz Institute of Polymer Research Dresden, Hohe Str. 6, D-01069 Dresden,  
Germany
- c. State Key Laboratory of Supramolecular Structure and Materials, College of  
Chemistry, Jilin University, Changchun, 130012, P. R. China.

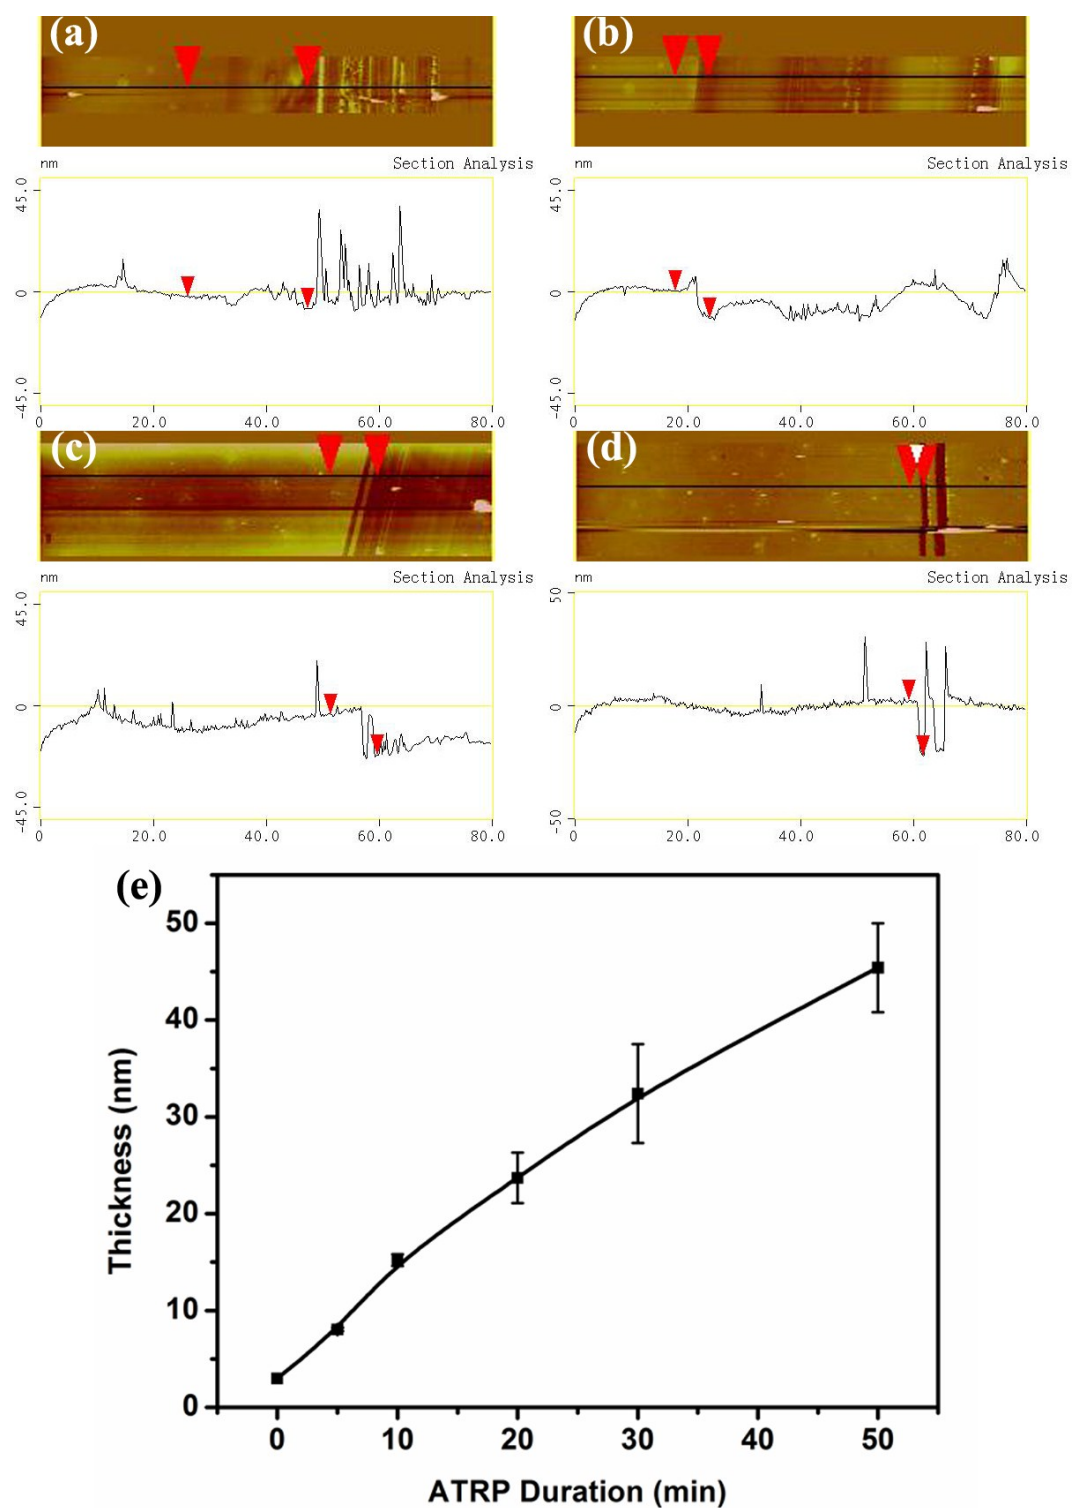

**Fig. S1** (a)-(d) the AFM image of polymer brush obtained after SI-ATRP with different polymerization duration. (e) The thickness of PNIPAm as a function of polymerization duration.

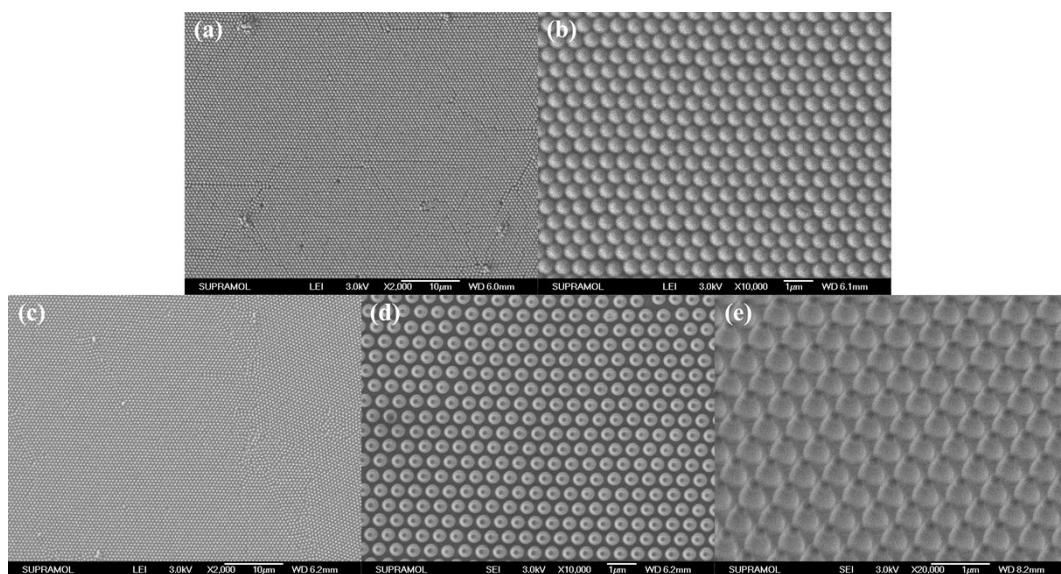

**Fig. S2** (a) and (b) large area SEM image of the PS sphere mask. (c-e) large area SEM image of the microstructure obtained after RIE etching treatment, (c-d) top view and (e) 45° tilted view.

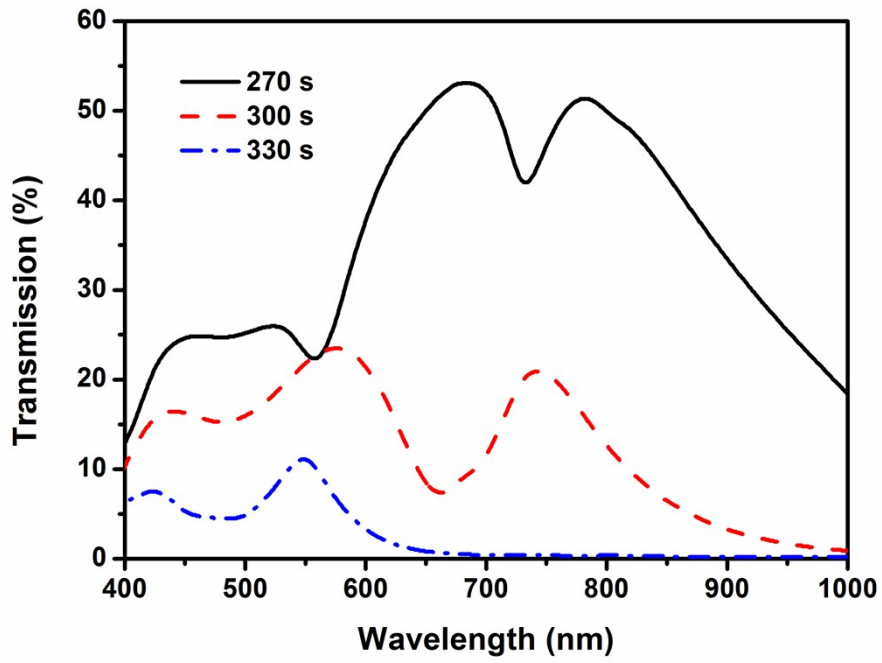

**Fig. S3** The measured transmission spectra of the Ag nanovolcano array fabricated after etching the photoresist for different etching duration using PS sphere array as etching mask.

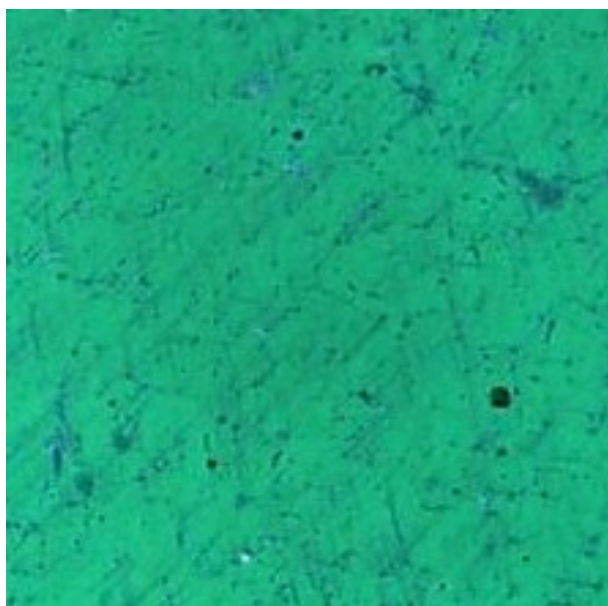

**Fig. S4** The optical microscope images of the as-prepared Ag nanovolcano array fabricated after etching for 330 s;

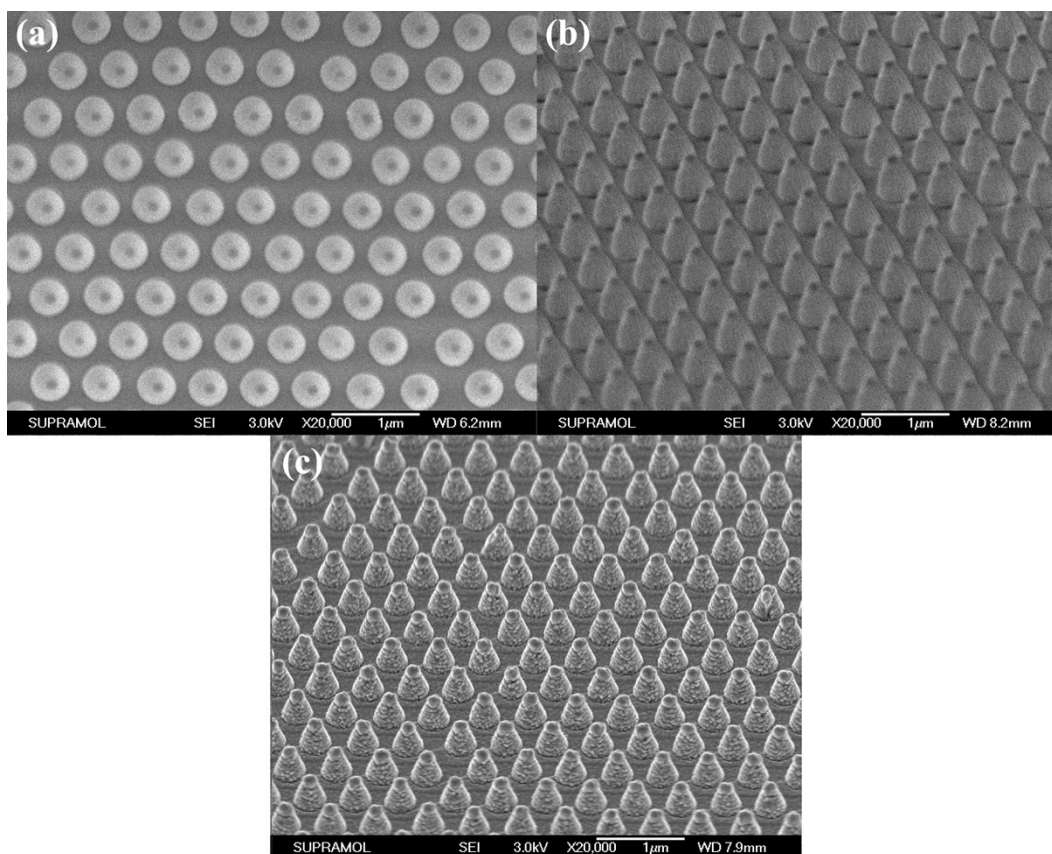

**Fig. S5** (a) top view and (b) 45° tilted view SEM image of the microstructure obtained after RIE etching treatment for 360 s. (c) 45° tilted view SEM image of (b) after deposition of 100-nm Ag.

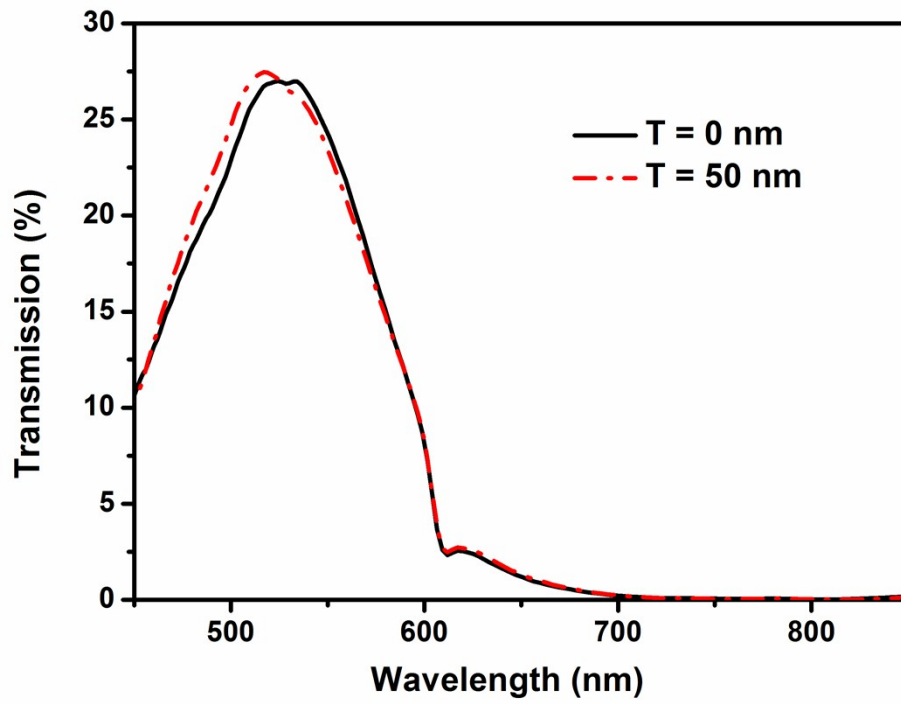

**Fig. S6** The calculated transmission spectra of the responsive Ag nanovolcano array with and without PNIPAm brush in the cavity of the Ag nanovolcano;

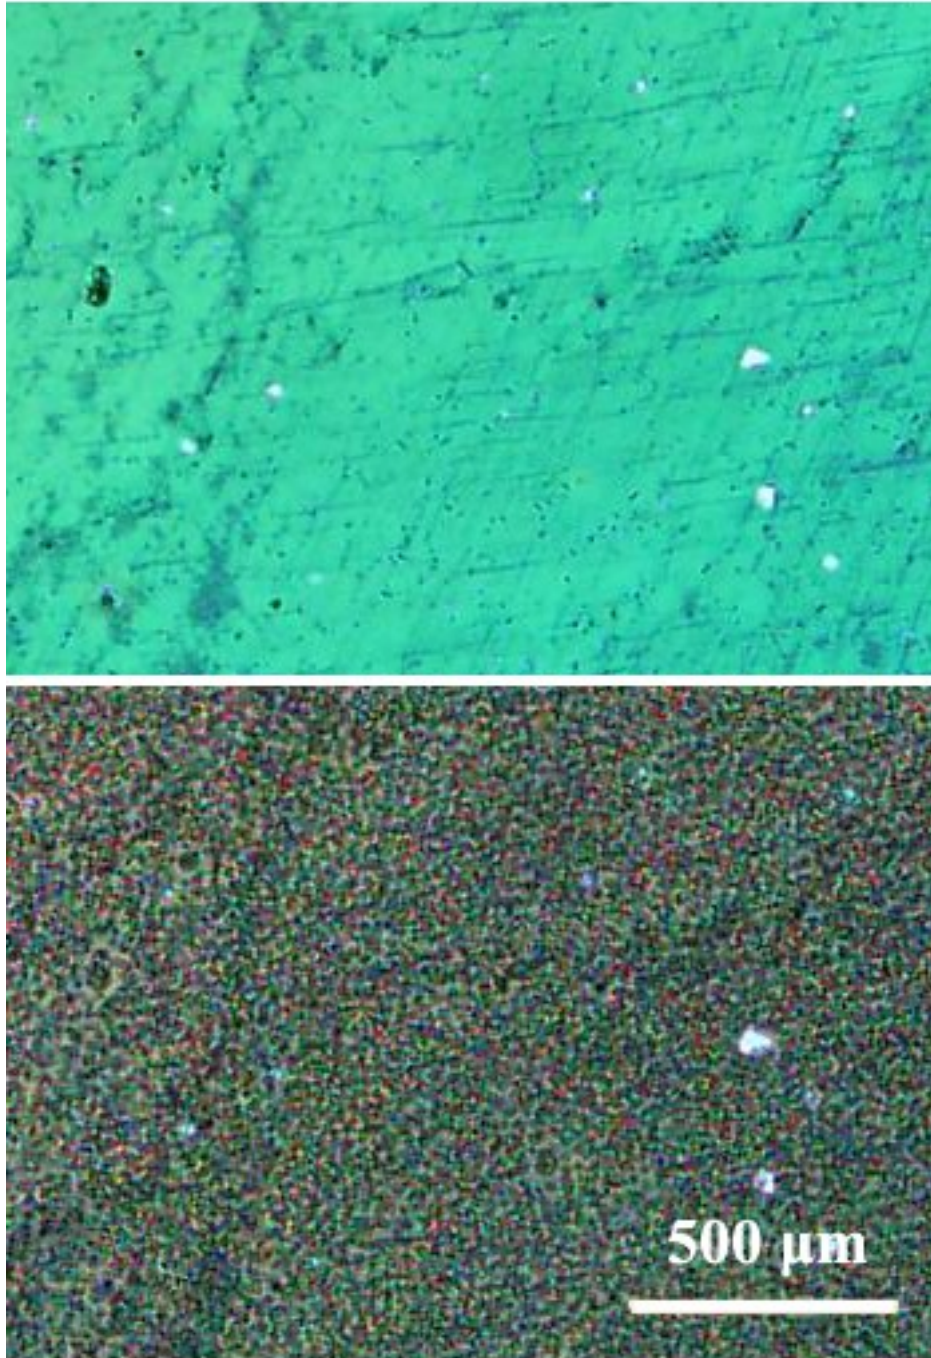

**Fig. S7** The optical microscope images of the Ag nanovolcano array without PNIPAm brush (top) before and (bottom) after exposure in saturated water vapor.
